# Supplementary material for: Influence of Electronic Cigarette Characteristics on Susceptibility, Perceptions, and Abuse Liability Indices among Combustible Tobacco Cigarette Smokers and Non-Smokers
Source: MDPI journal article supplement (doi:10.3390/ijerph16101825), 2019-05-23
Supplement: s1 [file s1]

## Supplemental Figure S1: Example ECIG Regulatory Condition (No Nicotine) Outcome Measures

### Susceptibility to ECIG Use (4 items)

Do you think that you will use an e-cigarette with no nicotine soon?

Definitely yes

Probably yes

Probably not

Definitely not

Do you think that in the future you might experiment with e-cigarettes with no nicotine?  
Would you say . . .

Definitely yes

Probably yes

Probably not

Definitely not

Do you think you will use an e-cigarette with no nicotine in the next year? Would you say . . .

Definitely yes

Probably yes

Probably not

Definitely not

If one of your best friends were to offer you an e-cigarette with no nicotine, would you use it? Would you say . . .

Definitely yes

Probably yes

Probably not

Definitely not

## Perceived ECIG relative harm and addiction (2 items)

Compared to regular-strength non-menthol cigarettes, how harmful do you think that the following product is to your health?

E-cigarette with no nicotine

|                    |                       |                |                       |                    |            |
|--------------------|-----------------------|----------------|-----------------------|--------------------|------------|
| A lot less harmful | A little less harmful | About the same | A little more harmful | A lot more harmful | Don't know |
|--------------------|-----------------------|----------------|-----------------------|--------------------|------------|

What do you think the likelihood of addiction is when using each of these products?

E-cigarette with no nicotine

|            |          |            |           |           |            |
|------------|----------|------------|-----------|-----------|------------|
| Not at all | Slightly | Moderately | Very Much | Extremely | Don't know |
|------------|----------|------------|-----------|-----------|------------|

## ECIG Purchase Task (16 prices)

### E-cigarette No Nicotine Purchasing Task

Imagine a TYPICAL DAY. The following questions ask how many times you would take 10 puffs of an e-cigarette with no nicotine if every 10 puffs cost various amounts of money. **The only available e-cigarette is the one with no nicotine.** Assume that you have the same income/savings that you have now and NO ACCESS to any other tobacco or nicotine products other than the e-cigarette offered at these prices. In addition, assume that you would consume the e-cigarette puffs that you request on that day; that is, you cannot save or stockpile e-cigarette puffs for a later date. Please respond to these questions honestly.

How many times would you take 10 puffs of an e-cigarette with no nicotine if they were \_\_\_\_ each at the following prices?

Number of times you would take 10 puffs of an e-cigarette with no nicotine

Price per 10 puffs of an e-cigarette with no nicotine: \$0 (free)

Price per 10 puffs of an e-cigarette with no nicotine: \$0.01

Price per 10 puffs of an e-cigarette with no nicotine: \$0.02

Price per 10 puffs of  
an e-cigarette with no  
nicotine: \$0.04

Price per 10 puffs of  
an e-cigarette with no  
nicotine: \$0.08

Price per 10 puffs of  
an e-cigarette with no  
nicotine: \$0.16

Price per 10 puffs of  
an e-cigarette with no  
nicotine: \$0.32

Price per 10 puffs of  
an e-cigarette with no  
nicotine: \$0.64

Price per 10 puffs of  
an e-cigarette with no  
nicotine: \$1.28

Price per 10 puffs of  
an e-cigarette with no  
nicotine: \$2.56

Price per 10 puffs of  
an e-cigarette with no  
nicotine: \$3.84

Price per 10 puffs of  
an e-cigarette with no  
nicotine: \$5.12

Price per 10 puffs of  
an e-cigarette with no  
nicotine: \$6.40

Price per 10 puffs of  
an e-cigarette with no  
nicotine: \$7.68

Price per 10 puffs of  
an e-cigarette with no  
nicotine: \$8.96

Price per 10 puffs of  
an e-cigarette with no  
nicotine: \$10.24

Supplemental Table S1. Adjusted Associations for All Covariates among the Nicotine Domain and Susceptibility, Perceptions, and Abuse Liability Indices.

| Variable                   | Susceptibility to<br>ECIG use<br>(n=186) |                  | Perceived ECIG<br>Relative Harm<br>(n=245) |                  | Perceived ECIG<br>Addiction<br>(n=245) |                  | Log-Breakpoint<br>(n=254) |                  | Log-Intensity<br>(n=254) |                  |
|----------------------------|------------------------------------------|------------------|--------------------------------------------|------------------|----------------------------------------|------------------|---------------------------|------------------|--------------------------|------------------|
|                            | AOR                                      | p                | $\beta$                                    | p                | $\beta$                                | p                | $\beta$                   | p                | $\beta$                  | p                |
| ECIG Regulatory Condition  |                                          |                  |                                            |                  |                                        |                  |                           |                  |                          |                  |
| No nicotine ECIG           | Ref                                      |                  | Ref                                        |                  | Ref                                    |                  | Ref                       |                  | Ref                      |                  |
| Low nicotine content ECIG  | 2.22                                     | 0.098            | <b>0.42</b>                                | <b>0.006</b>     | <b>1.14</b>                            | <b>&lt;0.001</b> | <b>0.69</b>               | <b>0.034</b>     | 0.72                     | 0.107            |
| High nicotine content ECIG | 1.60                                     | 0.341            | <b>1.19</b>                                | <b>&lt;0.001</b> | <b>1.96</b>                            | <b>&lt;0.001</b> | 0.50                      | 0.143            | 0.33                     | 0.479            |
| Gender                     |                                          |                  |                                            |                  |                                        |                  |                           |                  |                          |                  |
| Male                       | Ref                                      |                  | Ref                                        |                  | Ref                                    |                  | Ref                       |                  | Ref                      |                  |
| Female                     | 0.66                                     | 0.302            | -0.09                                      | 0.468            | -0.06                                  | 0.603            | -0.11                     | 0.703            | -0.15                    | 0.696            |
| Age                        |                                          |                  |                                            |                  |                                        |                  |                           |                  |                          |                  |
| 18-25                      | Ref                                      |                  | Ref                                        |                  | Ref                                    |                  | Ref                       |                  | Ref                      |                  |
| 26-29                      | 1.34                                     | 0.654            | -0.39                                      | 0.057            | -0.18                                  | 0.352            | -0.25                     | 0.571            | -0.54                    | 0.378            |
| 30-36                      | 0.74                                     | 0.638            | -0.15                                      | 0.454            | 0.16                                   | 0.370            | -0.10                     | 0.810            | -0.65                    | 0.271            |
| 37+                        | 0.74                                     | 0.613            | -0.11                                      | 0.575            | <b>0.44</b>                            | <b>0.013</b>     | 0.03                      | 0.948            | -0.07                    | 0.894            |
| Race/ethnicity             |                                          |                  |                                            |                  |                                        |                  |                           |                  |                          |                  |
| White/Caucasian            | Ref                                      |                  | Ref                                        |                  | Ref                                    |                  | Ref                       |                  | Ref                      |                  |
| Asian                      | 0.65                                     | 0.576            | 0.45                                       | 0.070            | -0.07                                  | 0.770            | 0.80                      | 0.143            | 0.05                     | 0.943            |
| Other                      | 0.45                                     | 0.170            | <b>0.50</b>                                | <b>0.007</b>     | 0.18                                   | 0.281            | 0.19                      | 0.621            | -0.38                    | 0.469            |
| Education                  |                                          |                  |                                            |                  |                                        |                  |                           |                  |                          |                  |
| High School/GED or below   | Ref                                      |                  | Ref                                        |                  | Ref                                    |                  | Ref                       |                  | Ref                      |                  |
| Some College               | 1.39                                     | 0.581            | -0.02                                      | 0.914            | -0.13                                  | 0.429            | 0.29                      | 0.449            | -0.09                    | 0.862            |
| College Graduate           | 1.60                                     | 0.447            | 0.04                                       | 0.839            | -0.05                                  | 0.783            | 0.40                      | 0.306            | -0.09                    | 0.867            |
| Post-college Education     | 3.45                                     | 0.120            | 0.10                                       | 0.678            | -0.11                                  | 0.649            | 0.86                      | 0.114            | 0.05                     | 0.943            |
| CTC/ECIG Status            |                                          |                  |                                            |                  |                                        |                  |                           |                  |                          |                  |
| Non-CTC/ECIG user          | Ref                                      |                  | Ref                                        |                  | Ref                                    |                  | Ref                       |                  | Ref                      |                  |
| CTC-only smoker            | <b>29.75</b>                             | <b>&lt;0.001</b> | -0.26                                      | 0.097            | -0.06                                  | 0.674            | 2.94                      | <b>&lt;0.001</b> | 4.14                     | <b>&lt;0.001</b> |
| Dual CTC/ECIG user         | <sup>a</sup>                             | <sup>a</sup>     | <b>-0.47</b>                               | <b>0.005</b>     | -0.26                                  | 0.087            | 3.62                      | <b>&lt;0.001</b> | 5.59                     | <b>&lt;0.001</b> |

Note: CTC= Combustible Tobacco Cigarette; ECIG= Electronic Cigarette; GED=General Education Diploma; AOR= Adjusted Odds Ratio; Ref = reference category. **Bold** values indicate statistical significance ( $p<0.05$ ). <sup>a</sup> Due to cell size frequency, this response category was not included in analyses for the susceptibility to ECIG use outcome.

Supplemental Table S2. Adjusted Associations for All Covariates among the ECIG Flavor Domain and Susceptibility, Perceptions, and Abuse Liability Indices

|                           | Susceptibility for<br>ECIG use<br>(n=184) |                  | Perceived ECIG<br>Relative Harm<br>(n=247) |              | Perceived ECIG<br>Addiction<br>(n=247) |          | Log-Breakpoint<br>(n=261) |                  | Log-Intensity<br>(n=261) |                  |
|---------------------------|-------------------------------------------|------------------|--------------------------------------------|--------------|----------------------------------------|----------|---------------------------|------------------|--------------------------|------------------|
|                           | AOR                                       | <i>p</i>         | $\beta$                                    | <i>p</i>     | $\beta$                                | <i>p</i> | $\beta$                   | <i>p</i>         | $\beta$                  | <i>p</i>         |
| ECIG Regulatory Condition |                                           |                  |                                            |              |                                        |          |                           |                  |                          |                  |
| Tobacco-flavored ECIG     | Ref                                       |                  | Ref                                        |              | Ref                                    |          | Ref                       |                  | Ref                      |                  |
| Menthol-flavored ECIG     | <b>0.33</b>                               | <b>0.020</b>     | <b>0.52</b>                                | <b>0.001</b> | 0.25                                   | 0.136    | <b>-0.93</b>              | <b>0.008</b>     | <b>-1.33</b>             | <b>0.002</b>     |
| Fruit-flavored ECIG       | 0.77                                      | 0.548            | 0.08                                       | 0.603        | -0.09                                  | 0.597    | -0.15                     | 0.663            | 0.21                     | 0.612            |
| Gender                    |                                           |                  |                                            |              |                                        |          |                           |                  |                          |                  |
| Male                      | Ref                                       |                  | Ref                                        |              | Ref                                    |          | Ref                       |                  | Ref                      |                  |
| Female                    | 0.66                                      | 0.264            | -0.13                                      | 0.265        | 0.00                                   | 0.983    | 0.39                      | 0.168            | 0.31                     | 0.384            |
| Age                       |                                           |                  |                                            |              |                                        |          |                           |                  |                          |                  |
| 18-25                     | Ref                                       |                  | Ref                                        |              | Ref                                    |          | Ref                       |                  | Ref                      |                  |
| 26-29                     | 1.14                                      | 0.808            | -0.12                                      | 0.490        | -0.01                                  | 0.979    | -0.06                     | 0.891            | 0.47                     | 0.371            |
| 30-36                     | 0.49                                      | 0.215            | 0.01                                       | 0.967        | 0.23                                   | 0.280    | -0.40                     | 0.351            | -0.36                    | 0.503            |
| 37+                       | 0.51                                      | 0.226            | -0.08                                      | 0.671        | 0.07                                   | 0.735    | 0.11                      | 0.803            | -0.44                    | 0.406            |
| Race/ethnicity            |                                           |                  |                                            |              |                                        |          |                           |                  |                          |                  |
| White/Caucasian           | Ref                                       |                  | Ref                                        |              | Ref                                    |          | Ref                       |                  | Ref                      |                  |
| Asian                     | 0.53                                      | 0.443            | <b>0.60</b>                                | <b>0.016</b> | -0.02                                  | 0.937    | -0.71                     | 0.229            | -0.46                    | 0.529            |
| Other                     | 1.00                                      | 0.995            | 0.09                                       | 0.580        | -0.35                                  | 0.068    | 0.45                      | 0.254            | 0.48                     | 0.321            |
| Education                 |                                           |                  |                                            |              |                                        |          |                           |                  |                          |                  |
| High School/GED or below  | Ref                                       |                  | Ref                                        |              | Ref                                    |          | Ref                       |                  | Ref                      |                  |
| Some College              | 1.38                                      | 0.584            | -0.05                                      | 0.799        | 0.26                                   | 0.260    | 0.28                      | 0.547            | 0.40                     | 0.487            |
| College Graduate          | 1.34                                      | 0.592            | 0.07                                       | 0.727        | 0.05                                   | 0.817    | 0.14                      | 0.748            | -0.16                    | 0.776            |
| Post-college Education    | 0.49                                      | 0.379            | 0.21                                       | 0.384        | 0.14                                   | 0.617    | -0.78                     | 0.152            | -0.93                    | 0.171            |
| CTC/ECIG Status           |                                           |                  |                                            |              |                                        |          |                           |                  |                          |                  |
| Non-CTC/ECIG user         | Ref                                       |                  | Ref                                        |              | Ref                                    |          | Ref                       |                  | Ref                      |                  |
| CTC-only smoker           | 9.55                                      | <b>&lt;0.001</b> | <b>0.41</b>                                | <b>0.004</b> | 0.10                                   | 0.546    | 2.31                      | <b>&lt;0.001</b> | 3.76                     | <b>&lt;0.001</b> |
| Dual CTC/ECIG user        | - <sup>a</sup>                            | - <sup>a</sup>   | -0.16                                      | 0.259        | 0.02                                   | 0.925    | 3.41                      | <b>&lt;0.001</b> | 5.47                     | <b>&lt;0.001</b> |

Note: CTC= Combustible Tobacco Cigarette; ECIG=e-cigarette; GED=general education diploma; AOR= Adjusted Odds Ratio; **Bold** values indicate statistical significance

(*p*<0.05). <sup>a</sup> Due to cell size frequency, this response category was not included in analyses for the susceptibility to ECIG use outcome

Supplemental Table S3. Adjusted Associations for All Covariates among the Modified Risk Message Domain and Susceptibility, Perceptions, and Abuse Liability Indices

|                           | Susceptibility to<br>ECIG use<br>(n=138) |                  | Perceived ECIG<br>Relative Harm<br>(n=177) |                  | Perceived ECIG<br>Addiction<br>(n=174) |                  | Log-Breakpoint<br>(n=184) |                  | Log-Intensity<br>(n=184) |                  |
|---------------------------|------------------------------------------|------------------|--------------------------------------------|------------------|----------------------------------------|------------------|---------------------------|------------------|--------------------------|------------------|
|                           | AOR                                      | p                | $\beta$                                    | p                | $\beta$                                | p                | $\beta$                   | p                | $\beta$                  | p                |
| ECIG Regulatory Condition |                                          |                  |                                            |                  |                                        |                  |                           |                  |                          |                  |
| Reduced harm ECIG         | Ref                                      |                  | Ref                                        |                  | Ref                                    |                  | Ref                       |                  | Ref                      |                  |
| Reduced CE ECIG           | 0.40                                     | 0.075            | 0.16                                       | 0.173            | 0.17                                   | 0.232            | 0.19                      | 0.542            | -0.41                    | 0.255            |
| Gender                    |                                          |                  |                                            |                  |                                        |                  |                           |                  |                          |                  |
| Male                      | Ref                                      |                  | Ref                                        |                  | Ref                                    |                  | Ref                       |                  | Ref                      |                  |
| Female                    | <b>0.27</b>                              | <b>0.014</b>     | <b>0.28</b>                                | <b>0.021</b>     | 0.16                                   | 0.258            | -0.32                     | 0.311            | -0.44                    | 0.230            |
| Age                       |                                          |                  |                                            |                  |                                        |                  |                           |                  |                          |                  |
| 18-25                     | Ref                                      |                  | Ref                                        |                  | Ref                                    |                  | Ref                       |                  | Ref                      |                  |
| 26-29                     | 0.83                                     | 0.798            | -0.13                                      | 0.477            | 0.22                                   | 0.295            | 0.12                      | 0.789            | -0.06                    | 0.918            |
| 30-36                     | 0.49                                     | 0.360            | 0.06                                       | 0.712            | 0.30                                   | 0.141            | <b>-1.08</b>              | <b>0.019</b>     | -0.60                    | 0.258            |
| 37+                       | 0.48                                     | 0.331            | -0.16                                      | 0.348            | 0.28                                   | 0.176            | -0.30                     | 0.512            | -0.26                    | 0.626            |
| Race/ethnicity            |                                          |                  |                                            |                  |                                        |                  |                           |                  |                          |                  |
| White/Caucasian           | Ref                                      |                  | Ref                                        |                  | Ref                                    |                  | Ref                       |                  | Ref                      |                  |
| Asian                     | 3.82                                     | 0.085            | -0.20                                      | 0.291            | <b>-0.47</b>                           | <b>0.039</b>     | -0.59                     | 0.236            | 0.01                     | 0.991            |
| Other                     | 0.96                                     | 0.960            | 0.00                                       | 0.983            | <b>-0.73</b>                           | <b>&lt;0.001</b> | -0.72                     | 0.113            | <b>-1.33</b>             | <b>0.012</b>     |
| Education                 |                                          |                  |                                            |                  |                                        |                  |                           |                  |                          |                  |
| High School/GED or below  | Ref                                      |                  | Ref                                        |                  | Ref                                    |                  | Ref                       |                  | Ref                      |                  |
| Some College              | 0.52                                     | 0.506            | 0.02                                       | 0.916            | -0.04                                  | 0.878            | 0.33                      | 0.525            | -0.08                    | 0.895            |
| College Graduate          | 0.97                                     | 0.976            | -0.04                                      | 0.824            | -0.18                                  | 0.454            | 0.51                      | 0.333            | -0.13                    | 0.837            |
| Post-college Education    | 1.35                                     | 0.808            | -0.11                                      | 0.663            | -0.02                                  | 0.952            | 1.07                      | 0.102            | -0.20                    | 0.796            |
| CTC/ECIG Status           |                                          |                  |                                            |                  |                                        |                  |                           |                  |                          |                  |
| Non-CTC/ECIG user         | Ref                                      |                  | Ref                                        |                  | Ref                                    |                  | Ref                       |                  | Ref                      |                  |
| CTC-only smoker           | <b>43.88</b>                             | <b>&lt;0.001</b> | 0.16                                       | 0.253            | -0.23                                  | 0.170            | 3.71                      | <b>&lt;0.001</b> | 4.98                     | <b>&lt;0.001</b> |
| Dual CTC/ECIG user        | <sup>a</sup>                             | <sup>a</sup>     | <b>-0.61</b>                               | <b>&lt;0.001</b> | -0.19                                  | 0.284            | 4.19                      | <b>&lt;0.001</b> | 6.94                     | <b>&lt;0.001</b> |

Note: CE=carcinogen exposure; CTC=Combustible Tobacco Cigarette; ECIG=e-cigarette; GED=general education diploma; AOR= Adjusted Odds Ratio; **Bold** values indicate statistical significance ( $p<0.05$ ).<sup>a</sup> Due to cell size frequency, this response category was not included in analyses for the susceptibility to ECIG use outcome.
